# Supplementary material
Source: PubMed Central journal article supplement (PMC10440372)
Supplement: NIHMS1880629-supplement-Figure_S2.pdf [file NIHMS1880629-supplement-Figure_S2.pdf]

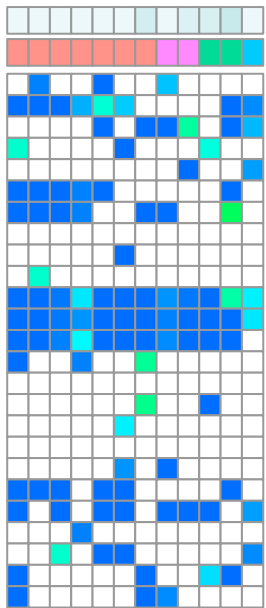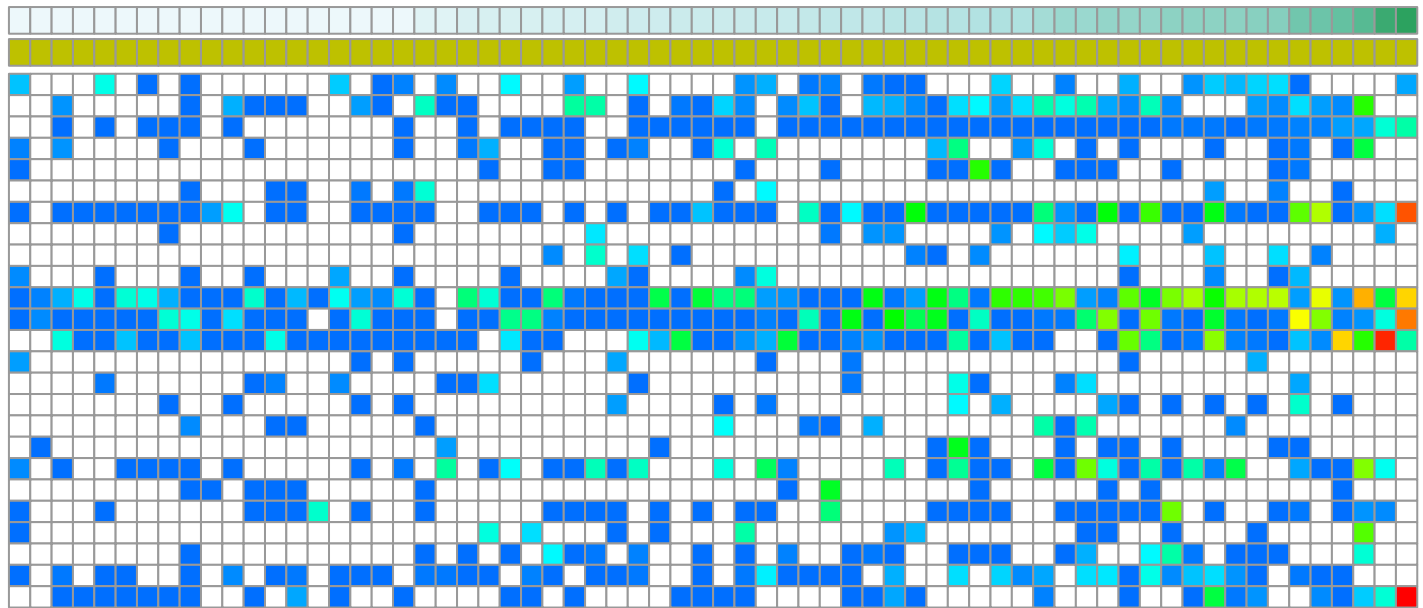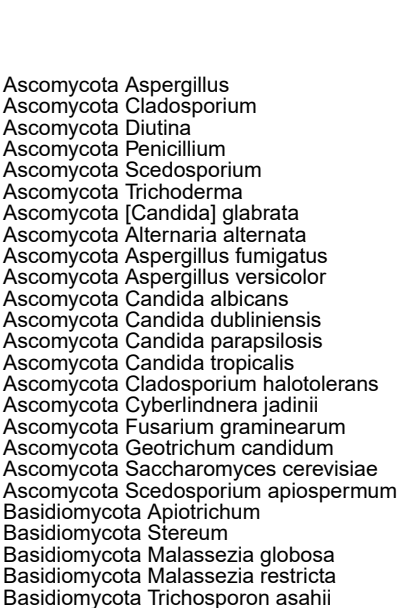

**Scaled relative abundance**

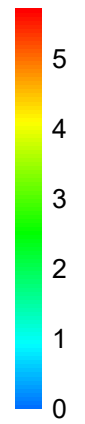

**Log 10(copy number/ $\mu$ L sputum)**

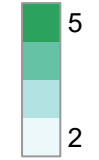

**SampleType**

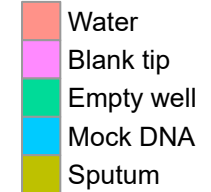

geneblock1  
 Extractemptywell1  
 Extractemptywell2  
 Extractblanktip1  
 Extractblanktip2  
 DNAfreewater2  
 Control5 .water  
 Control6 .water  
 Control2 .water  
 Control3 .water  
 Control1 .water  
 Control4 .water  
 Sub10068  
 Sub10042  
 Sub10086  
 Sub10102  
 Sub10092  
 Sub10032  
 Sub10027  
 Sub10117  
 Sub10093  
 Sub10084  
 Sub10050  
 Sub10023  
 Sub10104  
 Sub10018  
 Sub10002  
 Sub10034  
 Sub10038  
 Sub10091  
 Sub10125  
 Sub10028  
 Sub10025  
 Sub10043  
 Sub10006  
 Sub10078  
 Sub10063  
 Sub10057  
 Sub10078  
 Sub10078  
 Sub10057  
 Sub10097  
 Sub10014  
 Sub10121  
 Sub10099  
 Sub10120  
 Sub10001  
 Sub10114  
 Sub10005  
 Sub10045  
 Sub10009  
 Sub10026  
 Sub10007  
 Sub10003  
 Sub10010  
 Sub10015  
 Sub10080  
 Sub10064  
 Sub10024  
 Sub10111  
 Sub10112  
 Sub10096  
 Sub10127  
 Sub10020  
 Sub10123  
 Sub10122  
 Sub10117  
 Sub10110  
 Sub10109  
 Sub10108  
 Sub10103  
 Sub10101  
 Sub10098  
 Sub10094  
 Sub10090  
 Sub10071  
 Sub10070  
 Sub10069  
 Sub10044  
 Sub10030  
 Sub10008

Ascomycota Aspergillus  
 Ascomycota Cladosporium  
 Ascomycota Diutina  
 Ascomycota Penicillium  
 Ascomycota Scedosporium  
 Ascomycota Trichoderma  
 Ascomycota [Candida] glabrata  
 Ascomycota Alternaria alternata  
 Ascomycota Aspergillus fumigatus  
 Ascomycota Aspergillus versicolor  
 Ascomycota Candida albicans  
 Ascomycota Candida dubliniensis  
 Ascomycota Candida parapsilosis  
 Ascomycota Candida tropicalis  
 Ascomycota Cladosporium halotolerans  
 Ascomycota Cyberlindnera jadinii  
 Ascomycota Fusarium graminearum  
 Ascomycota Geotrichum candidum  
 Ascomycota Saccharomyces cerevisiae  
 Ascomycota Scedosporium apiospermum  
 Basidiomycota Apiotrichum  
 Basidiomycota Stereum  
 Basidiomycota Malassezia globosa  
 Basidiomycota Malassezia restricta  
 Basidiomycota Trichosporon asahii
