# Supplementary material
Source: PubMed Central journal article supplement (PMC10440372)

**A**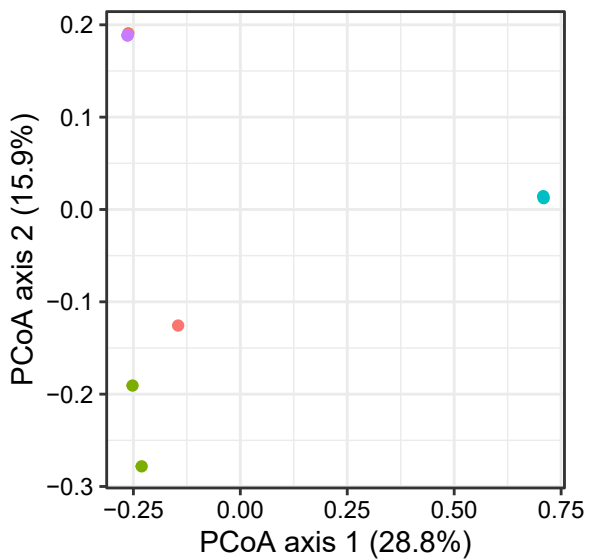**B**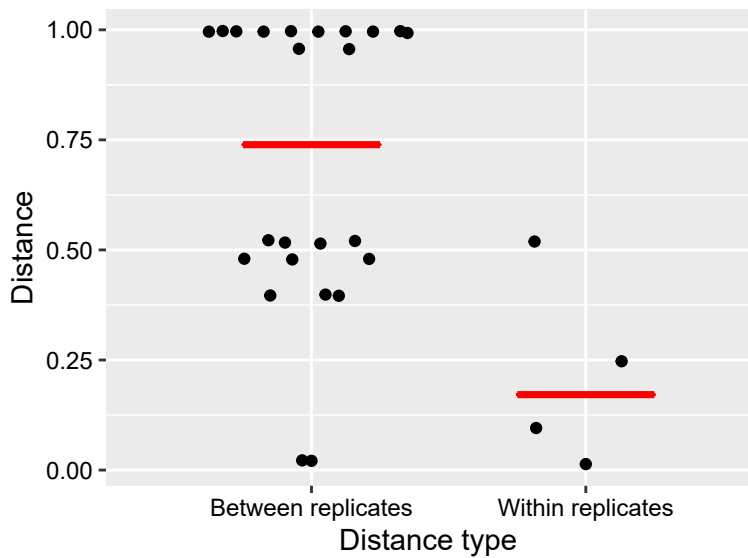

Supplement: NIHMS1880629-supplement-Figure_S1.pdf [file NIHMS1880629-supplement-Figure_S1.pdf]

**A****Pulmonary exacerbation**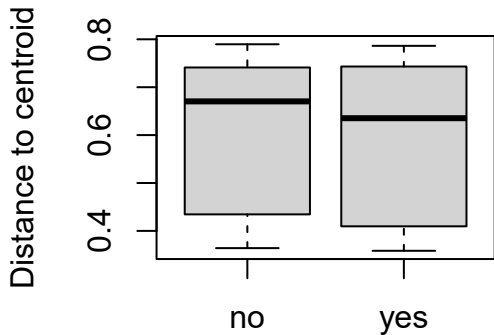**B****Respiratory score**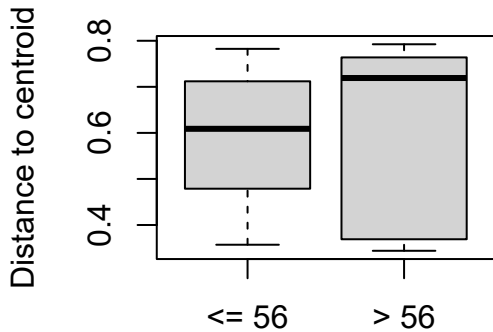

Supplement: NIHMS1880629-supplement-Figure_S3.pdf [file NIHMS1880629-supplement-Figure_S3.pdf]

**A**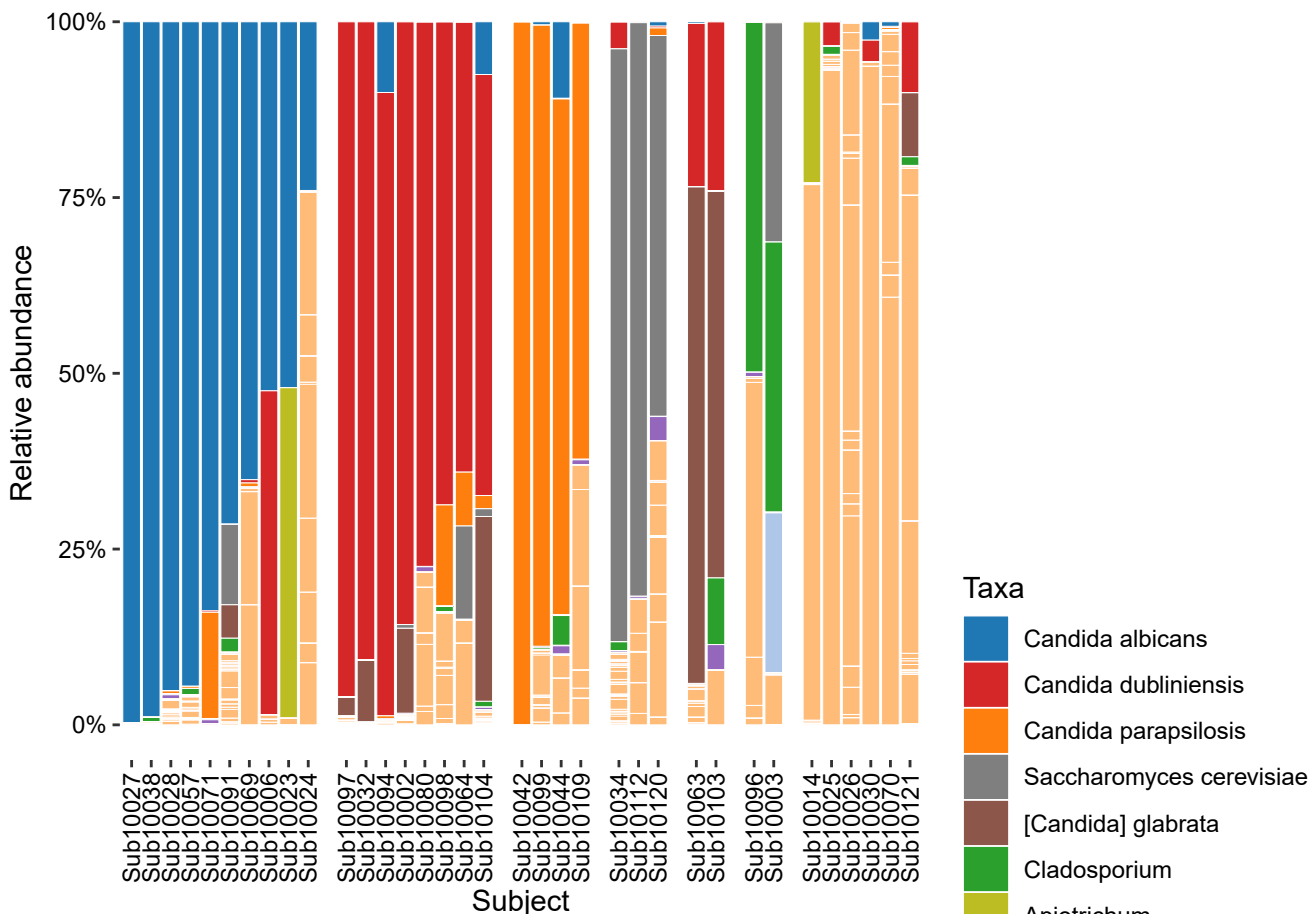**B**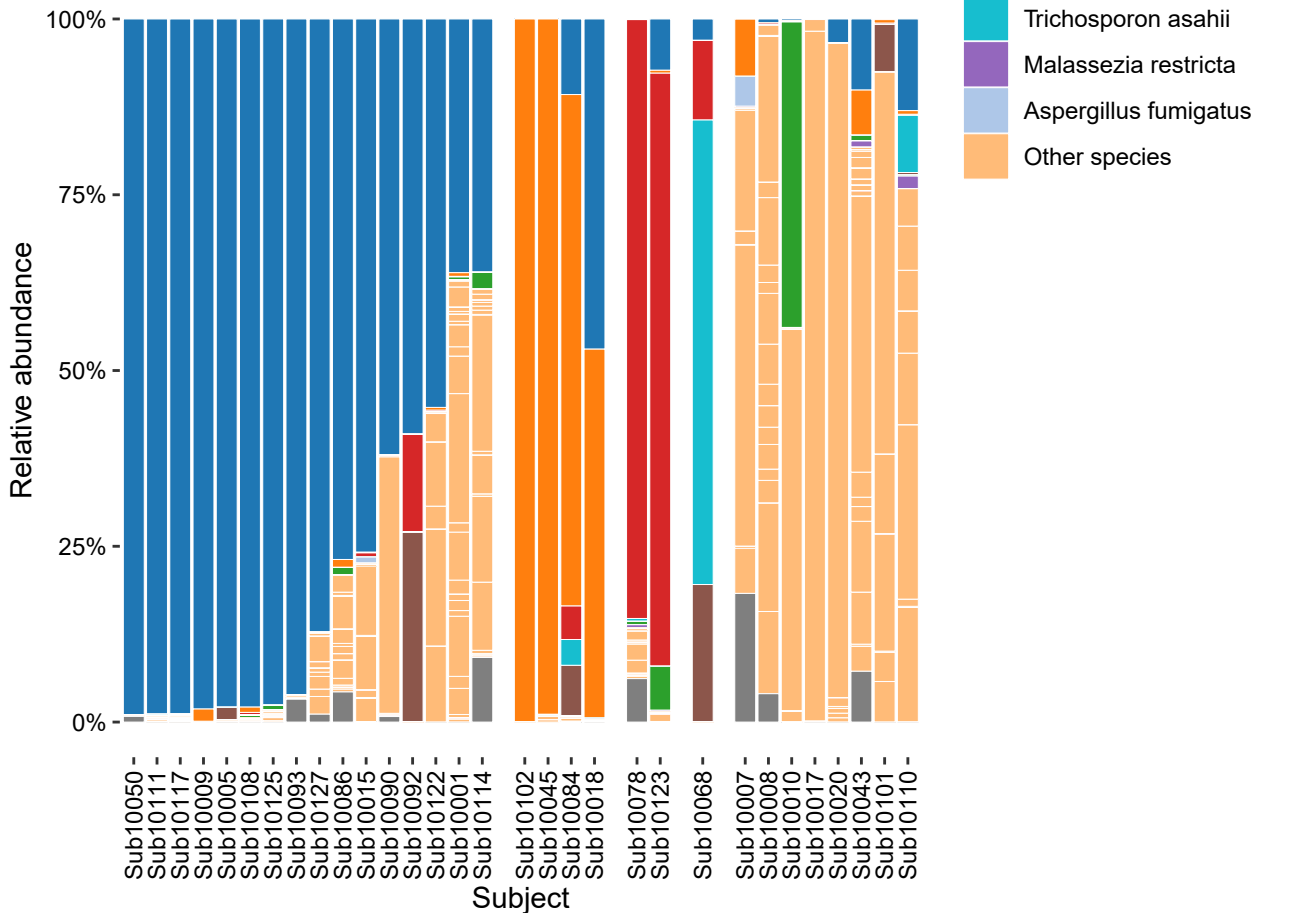

Supplement: NIHMS1880629-supplement-Figure_S4.pdf [file NIHMS1880629-supplement-Figure_S4.pdf]
